# Supplementary material
Source: PubMed Central journal article supplement (PMC7269766)
Supplement: supp_RA120000639_158332_3_supp_505353_q8d8dh.pdf [file supp_RA120000639_158332_3_supp_505353_q8d8dh.pdf]

# Supplement

## SUPPLEMENTAL FIGURES

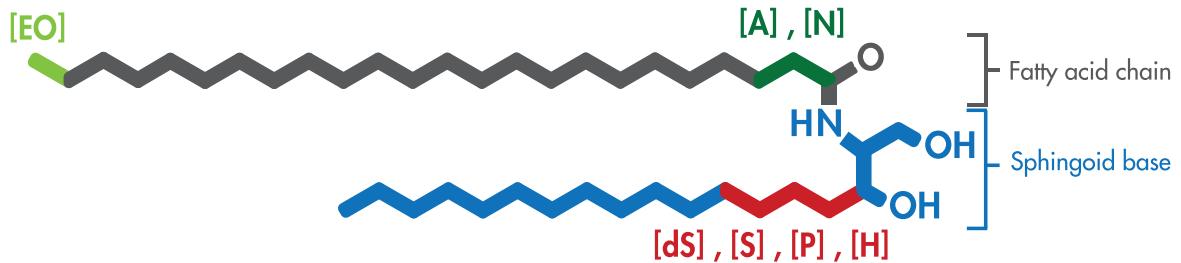

|                            | Non-hydroxy fatty acid, [N] | $\alpha$ -hydroxy fatty acid, [A] | Esterified $\omega$ -hydroxy fatty acid, [EO] |
|----------------------------|-----------------------------|-----------------------------------|-----------------------------------------------|
| Dihydrosphingosine, [dS]   | [NdS]                       | [AdS]                             | [EOdS]                                        |
| Sphingosine, [S]           | [NS]                        | [AS]                              | [EOS]                                         |
| Phytosphingosine, [P]      | [NP]                        | [AP]                              | [EOP]                                         |
| 6-hydroxy sphingosine, [H] | [NH]                        | [AH]                              | [EOH]                                         |

**Supplemental Figure S1: ceramide subclass nomenclature, based on the molecular architecture.** Ceramides bear two chains: one fatty acid chain and one sphingoid base. In human skin, both chains can vary in their structure at specific locations (red/green). The nomenclature is based on the abbreviation for the fatty acid chain (Esterified Omega-hydroxy fatty acid [EO], Non-hydroxy fatty acid [N], Alpha-hydroxy fatty acid [A]), combined with the 1 or 2 letter abbreviation for the sphingoid base (dihydroSphingosine [dS], Sphingosine [S], Phytosphingosine [P], 6-Hydroxy sphingosine [H]). Together, this results in the presence of the 12 most common subclasses: [AS], [NS], [AP], [NP], [AH], [NH], [AdS], [NdS], [EOS], [EOP], [EOH], [EOdS] (Motta et al., 1993, van Smeden et al., 2011).

|                 | GBA expression<br>(20x) (63x)<br>H = 80 μm I = 40 μm |  | GBA activity<br>(63x)<br>I = 40 μm | ASM expression<br>(20x) (63x)<br>H = 80 μm I = 40 μm |  | ASM activity<br>(63x)<br>I = 40 μm | Protease activity<br>I = 400 μm** | H&E<br>I = 70 μm |
|-----------------|------------------------------------------------------|--|------------------------------------|------------------------------------------------------|--|------------------------------------|-----------------------------------|------------------|
| <b>1</b>        |                                                      |  |                                    |                                                      |  |                                    |                                   |                  |
| <b>2</b>        |                                                      |  |                                    |                                                      |  |                                    |                                   |                  |
| <b>3</b>        |                                                      |  |                                    |                                                      |  |                                    |                                   |                  |
| <b>4</b>        |                                                      |  |                                    |                                                      |  |                                    |                                   |                  |
| <b>5</b>        |                                                      |  |                                    |                                                      |  |                                    |                                   |                  |
| <b>6</b>        |                                                      |  |                                    |                                                      |  |                                    |                                   |                  |
| <b>7</b>        |                                                      |  |                                    |                                                      |  |                                    |                                   |                  |
| <b>8</b>        |                                                      |  |                                    |                                                      |  |                                    |                                   |                  |
| <b>9</b>        |                                                      |  |                                    |                                                      |  |                                    |                                   |                  |
| <b>10</b>       |                                                      |  |                                    |                                                      |  |                                    |                                   |                  |
| <b>Control*</b> |                                                      |  |                                    |                                                      |  |                                    |                                   |                  |

Supplemental Figure S2: Overview of all stainings in each individual NTS subject and representative examples for the healthy control group. \*: all healthy subjects demonstrated comparable photographs for the different stainings, therefore only 1 representative image is shown. \*\*: This scale bar represents the main microscope picture, not the zoomed/boxed highlighted areas.

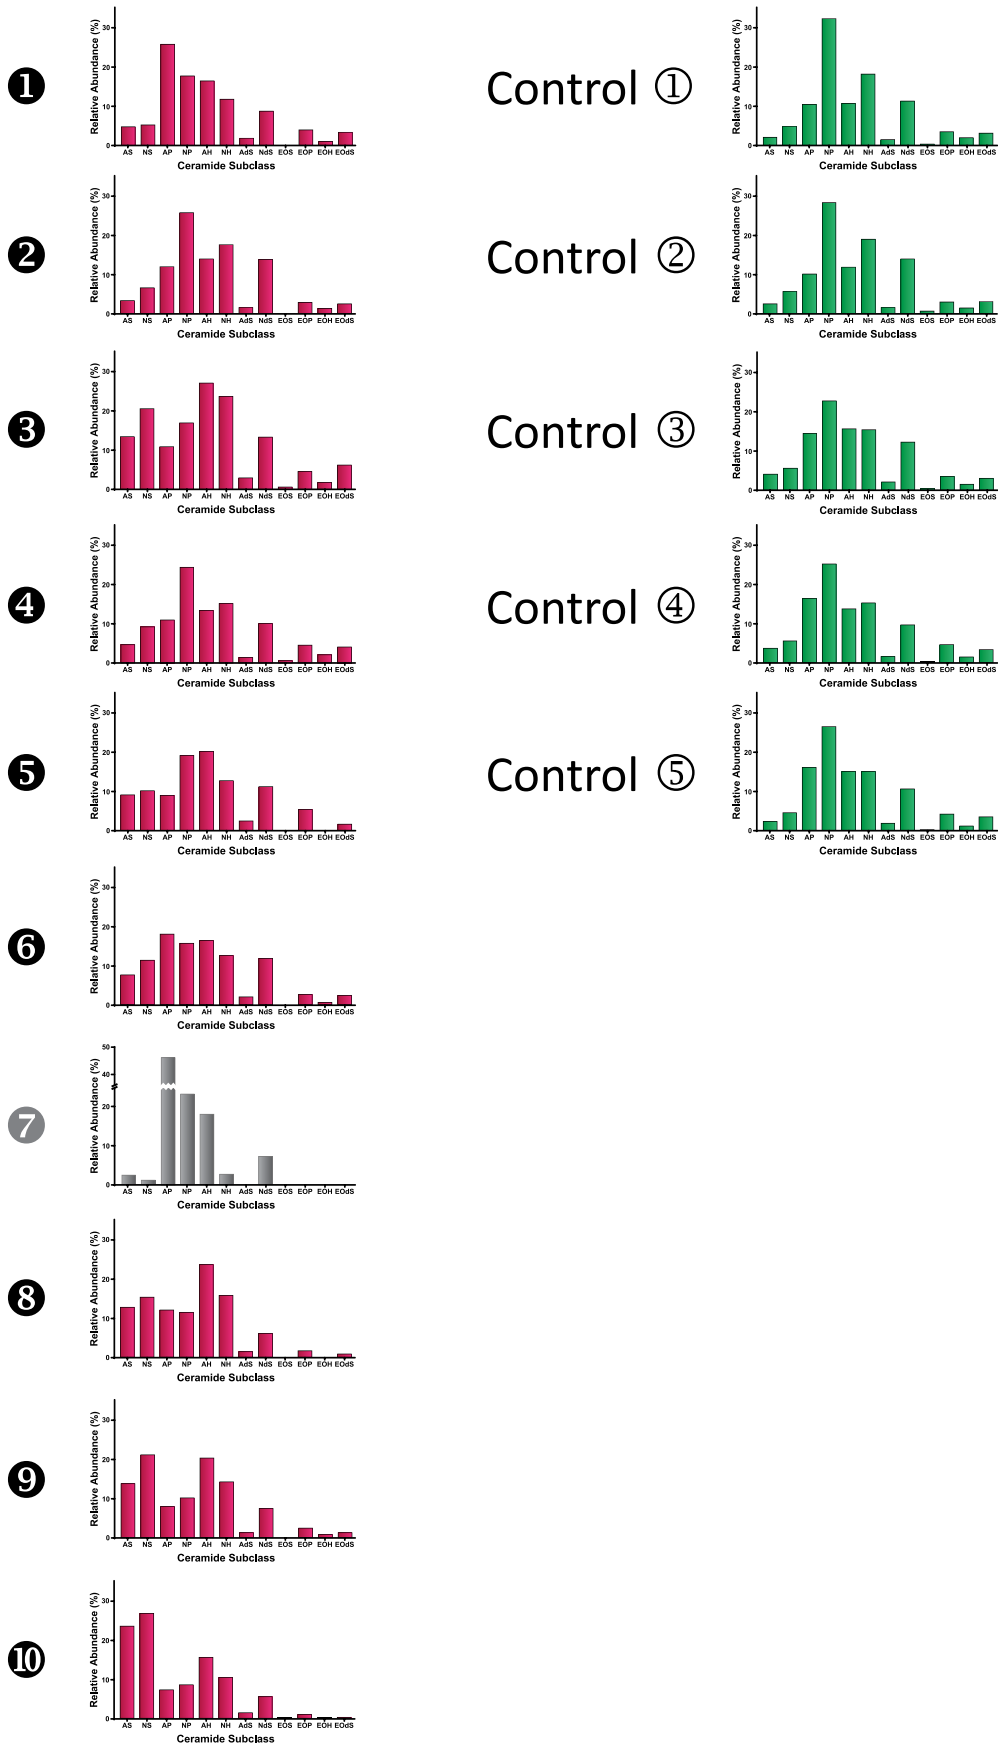

**Supplemental Figure S3: SC ceramide subclass profile of each individual NTS subject (and healthy control group).** For each ceramide subclass, the relative abundance (% of peak areas) is plotted. Note that the amount of lipids obtained from NTS⑦ was very limited, making the outcomes less reliable compared to all other subjects.

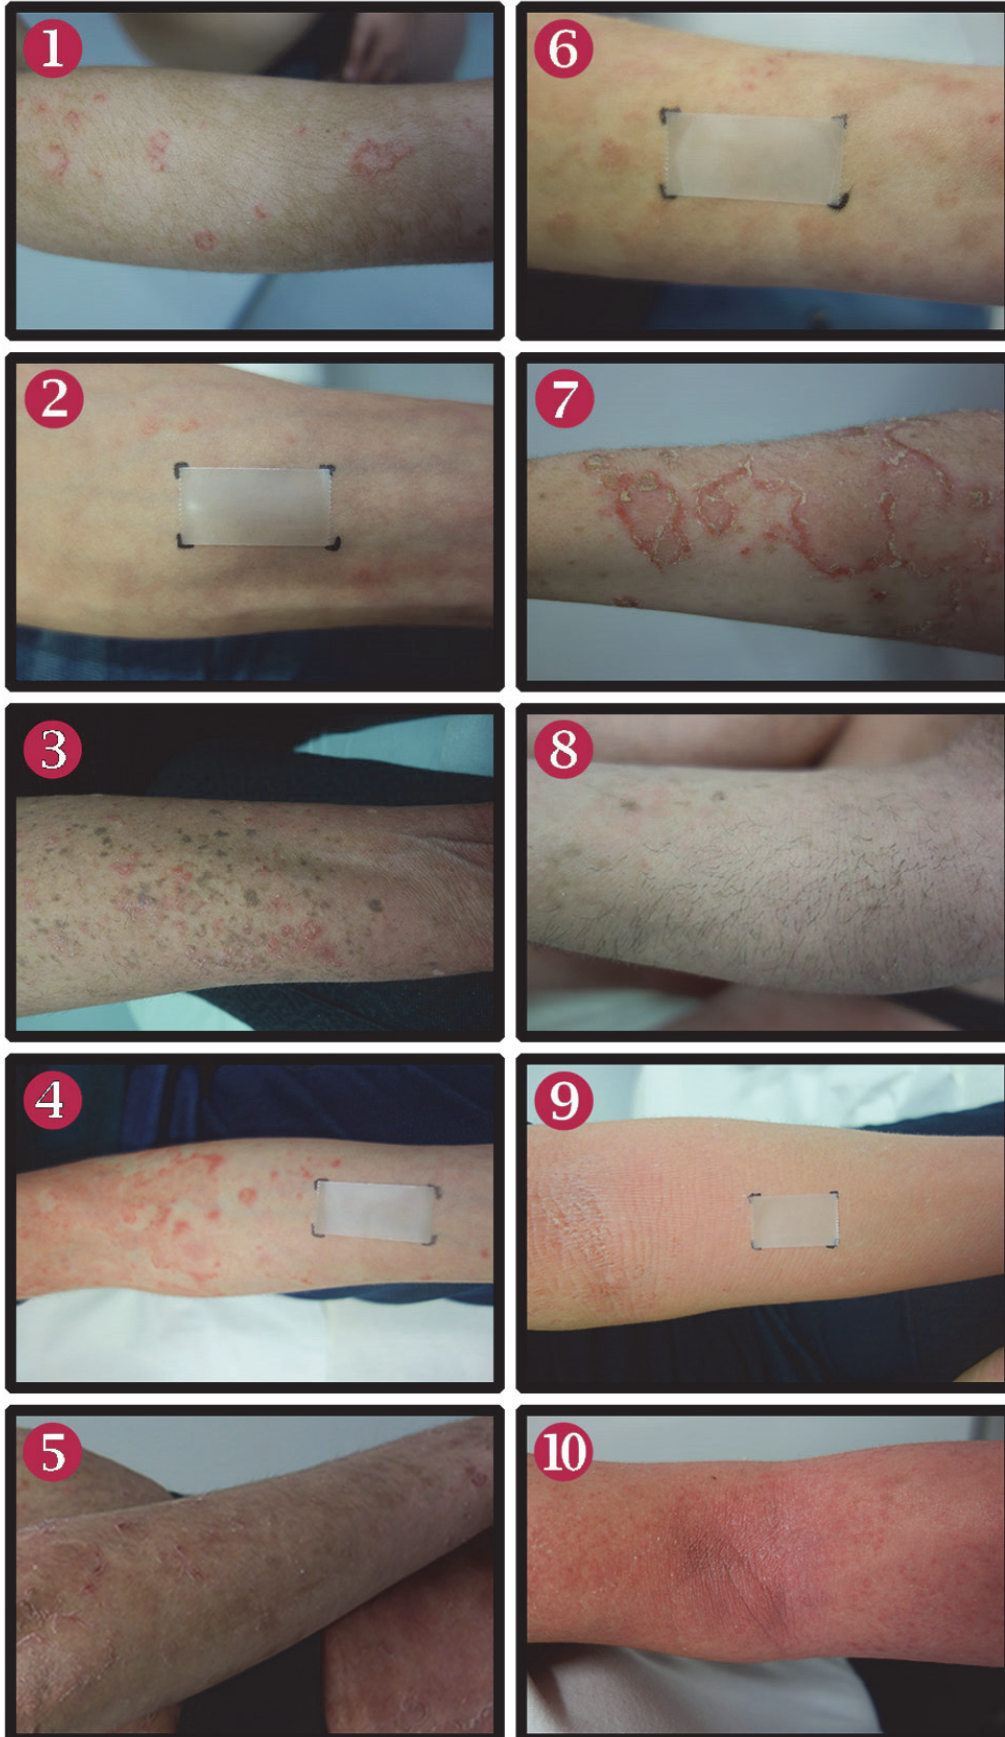

**Supplemental Figure S4: Photographs of the forearm of all 10 NTS patients. NTS ②,④,⑥,⑨ demonstrate the tape strip on the ventral forearm.**

## SUPPLEMENTAL TABLES

**Supplemental Table S1: Pearson correlation coefficients of all 12 analyzed ceramide subclasses**

| [NdS] | [NS]   | [NP]   | [NH]  | [AdS] | [AS]         | [AP]   | [AH]   | [EOdS] | [EOS] | [EOP]  | [EOH]  | Ceramide subclass |
|-------|--------|--------|-------|-------|--------------|--------|--------|--------|-------|--------|--------|-------------------|
| 1     | -0.56* | 0.67*  | 0.54* | 0.43  | -0.67*       | -0.21  | -0.59* | 0.46   | 0.50  | 0.57*  | 0.56*  | [NdS]             |
|       | 1      | -0.84* | 0.01  | 0.11  | <b>0.96*</b> | -0.55* | 0.45   | -0.26  | -0.30 | -0.39  | -0.39  | [NS]              |
|       |        | 1      | 0.27  | -0.11 | -0.86*       | 0.19   | -0.77* | 0.49   | 0.37  | 0.63*  | 0.43   | [NP]              |
|       |        |        | 1     | 0.54* | -0.17        | -0.78* | -0.32  | 0.54*  | 0.52* | 0.65*  | 0.63*  | [NH]              |
|       |        |        |       | 1     | 0.07         | -0.62* | 0.020  | 0.17   | 0.69* | 0.16   | 0.51   | [AdS]             |
|       |        |        |       |       | 1            | -0.40  | 0.50   | -0.37  | -0.38 | -0.56* | -0.54* | [AS]              |
|       |        |        |       |       |              | 1      | 0.05   | -0.32  | -0.41 | -0.29  | -0.30  | [AP]              |
|       |        |        |       |       |              |        | 1      | -0.56* | -0.26 | -0.73* | -0.47  | [AH]              |
|       |        |        |       |       |              |        |        | 1      | 0.33  | 0.74*  | 0.66*  | [EOdS]            |
|       |        |        |       |       |              |        |        |        | 1     | 0.52*  | 0.72*  | [EOS]             |
|       |        |        |       |       |              |        |        |        |       | 1      | 0.82*  | [EOP]             |
|       |        |        |       |       |              |        |        |        |       |        | 1      | [EOH]             |

Note the high correlation between [AS] and [NS] (R=0.96), indicating that an increased level of [AS] will be accompanied by an increased level of [NS] in this cohort of NTS subjects. \* indicates a significant correlation (p<0.05).

**Supplemental Table S2: Characteristics of patients with Netherton syndrome included in the study**

| NTS | Age (y/o) | Sex | Flare | Acanthosis | Scaly Erythroderma | ILC |
|-----|-----------|-----|-------|------------|--------------------|-----|
| ①   | 21        | F   | -     | 3          | 0                  | 1   |
| ②   | 16        | M   | +     | 2          | 0                  | 1   |
| ③   | 57        | F   | -     | 2          | 0                  | 2   |
| ④   | 12        | M   | +     | 1          | 0                  | 3   |
| ⑤   | 26        | F   | +     | 2          | 0                  | 3   |
| ⑥   | 18        | F   | +     | 3          | 0                  | 3   |
| ⑦   | 13        | F   | +     | 3          | 1                  | 3   |
| ⑧   | 41        | M   | -     | 3          | 2                  | 0   |
| ⑨   | 34        | F   | -     | 2          | 2                  | 0   |
| ⑩   | 17        | F   | -     | 3          | 3                  | 0   |

NTS represents the Netherton subject, ILC mean Ichthyosis Linearis Circumflexa. F and M indicate Female and Male, respectively. + and - correspond to present and absent. Score: 0 = Absent, 1 = Minimal, 2 = Moderate, 3 = Severe.

## SUPPLEMENTAL MATERIAL & METHODS

### **Developing and optimizing an *in-situ* zymography method for localization of active ASM**

To visualize active ASM in human epidermis, we developed and optimized an *in situ* zymography method using 6-HMU-PC (6-hexadecanoyl-4-methylumbelliferyl-phosphorylcholine), a specific ASM substrate that results in fluorogenic product 6-HMU (van Diggelen et al., 2005). The following parameters were optimized (detailed results in supplement): *i) Concentration of substrate 6-HMU-PC*: a concentration around 0.5 mM provided best results. Lower concentrations of substrate led to less signal and therefore suboptimal contrast. Higher concentrations increased the risk for insoluble or precipitated substrate clusters. *ii) Incubation period*: Incubation at 37°C successfully converted 6-HMU-PC into fluorescent 6-HMU, which could easily be observed after one hour. When incubating for ~4 hours or longer, diffusion became significant, interfering with the results by reducing the contrast. *iii) pH Incubation buffer*: fluorescent product was optimal at pH 5.2, and clearly reduced at pH  $\geq 5.4$ . *iv) Sodium Taurocholate as buffer additive*: addition of 0.2% (w/v) sodium taurocholate resulted in a more consistent signal along the whole skin section. Sodium Taurocholate catalyzes the enzyme activity (Takagi 1999). *v) Washing procedure*: Washing the skin sections after incubation with 6-HMU-PC was necessary to remove non-specific signal. Washing with Milli-Q proved more efficient in addition of 1% tween, resulting in clearer images with increased contrast. This method revealed active ASM at the SC layers of human skin (Figures below), particularly at the SG/SC interface. Negative control (human skin with incubation of buffer instead of 6-HMU-PC solution) did not demonstrate active ASM.

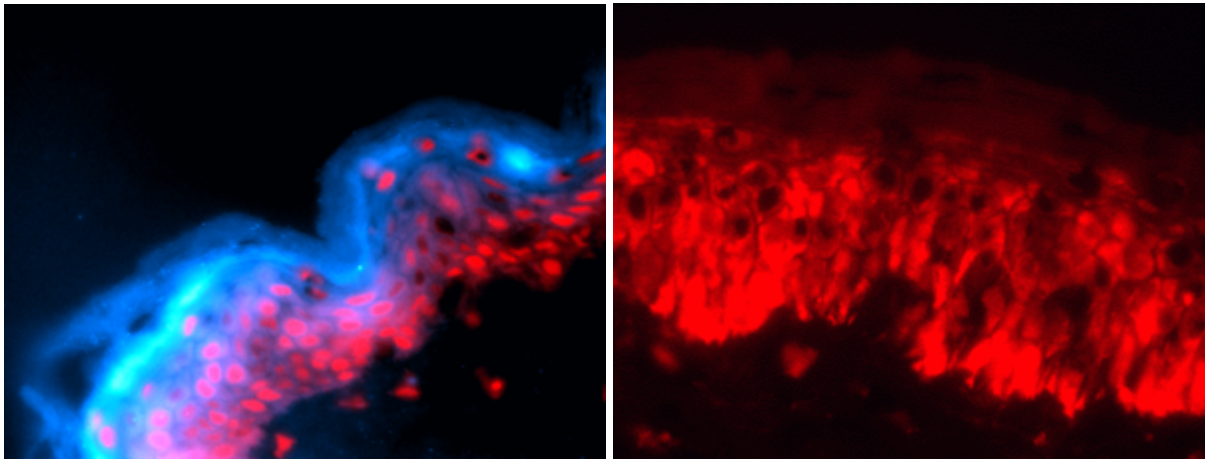

In-situ zymography of ASM activity, showing in blue/cyan active ASM (left figure). Negative control did not show ASM activity (right figure).

### Scoring of lipid parameters

*SC Ceramide scoring:* Scoring all NTS subjects was based on the deviation from the control value. Subject 7 was excluded as the amount of lipids obtained was minimal, and therefore the obtained relative values for [AS] + [NS] and [EO] less reliable. For the relative abundance of [AS] + [NS] (%), a mild increase is indicated in yellow (values between 50-75<sup>th</sup> percentile), whereas a more drastic increase is categorized as red (values above the 75<sup>th</sup> percentile). For [EO], a mediocre or strong decrease in relative abundance would lead to respectively a ‘yellow’ or ‘red’ label (values between 25-50<sup>th</sup> percentile, and values below 25<sup>th</sup> percentile, respectively).

| Subject | SC Ceramides    |           |
|---------|-----------------|-----------|
|         | [AS] + [NS] (%) | [EO] (%)  |
| ①       | 9.8             | 8.2       |
| ②       | 9.8             | 6.5       |
| ③       | 24.0            | 9.2       |
| ④       | 13.9            | 11.2      |
| ⑤       | 19.0            | 6.9       |
| ⑥       | 18.7            | 5.5       |
| ⑦       | 3.5 *           | 0.0 *     |
| ⑧       | 27.7            | 2.4       |
| ⑨       | 34.7            | 4.5       |
| ⑩       | 50.0            | 1.3       |
| Control | 8.0 ± 1.2       | 8.7 ± 0.5 |

*GBA+ASM scoring:* Scoring of the lipid biosynthesis enzymes and protease activity was based on all microscopy images from all sections of each individual subject. For control skin, variation between parameters was very low compared to NTS patients. The localization of expressed and active protein was first described and compared to healthy (see Table S3 on next page). For each parameter (GBA expression, ASM expression, GBA activity, and ASM activity), this written description was translated into:

- Equal to healthy skin
- Minor Differences: Partially equal, partially different from healthy skin
- Major Differences: (Almost) Completely different from healthy skin

“Different” means either expression or activity at a different location, or a substantial different intensity (e.g. completely absent). When constructing Table I located in the main text, the expression of the two enzymes GBA+ASM was scored in the following manner:

|                                                                                     |                                                                                  |
|-------------------------------------------------------------------------------------|----------------------------------------------------------------------------------|
|  | (Identical to) Healthy skin                                                      |
|  | Minor differences in one of the two enzymes                                      |
|  | Major difference in one of the two enzymes;<br>Minor differences in both enzymes |
|  | Major differences in both enzymes                                                |

| Subject | GBA+ASM enzymes                                                                       |                                                                                     |
|---------|---------------------------------------------------------------------------------------|-------------------------------------------------------------------------------------|
|         | Expression Score                                                                      | Activity Score                                                                      |
| ①       |    |  |
| ②       |    |  |
| ③       |    |  |
| ④       |    |  |
| ⑤       |    |  |
| ⑥       |  * |  |
| ⑦       |    |  |
| ⑧       |    |  |
| ⑨       |    |  |
| ⑩       |    |  |
| Control |    |  |

**Supplemental Table S3. Written description of each expression/activity staining in NTS individuals compared with control.**

| Subject        | GBA expression                                                                                | GBA activity                                                       | ASIM expression                                                        | ASM activity                                                        | Zymography (Casein Substrate)                                 |
|----------------|-----------------------------------------------------------------------------------------------|--------------------------------------------------------------------|------------------------------------------------------------------------|---------------------------------------------------------------------|---------------------------------------------------------------|
| <b>1</b>       | Heterogenous, either primarily at SG/SC interface, or intracellular, throughout the epidermis | Heterogenous, either absent or primarily at SG/SC interface        | Heterogenous, not localized throughout SC or primarily SG/SC interface | Present, primarily in outer SC layers                               | Mild casein activity in the stratum corneum                   |
| <b>2</b>       | Intracellular, throughout the epidermis                                                       | Present, primarily in outer SC layers                              | SG/SC interface and many SC layers                                     | Heterogenous, absent or present at parakeratotic cells              | Strong casein activity in the stratum corneum, Heterogenous   |
| <b>3</b>       | Primarily SG/SC interface                                                                     | Primarily SG/SC interface and lower SC layers, speckled            | Primarily SG/SC interface                                              | Present, speckled pattern                                           | Absent                                                        |
| <b>4</b>       | Primarily SG/SC interface                                                                     | Present, primarily in outer SC layers                              | Primarily SG/SC interface                                              | Present in outer SC layers                                          | Absent                                                        |
| <b>5</b>       | Heterogenous, either primarily at SG/SC interface, or intracellular, throughout the epidermis | Heterogenous, either almost absent or primarily at SG/SC interface | Heterogenous, not localized throughout SC or primarily SG/SC interface | Primarily at the SG/SC interface and lower SC layers                | Mild casein activity in the stratum corneum                   |
| <b>6</b>       | Intracellular, throughout the epidermis**                                                     | Not localized, throughout SC                                       | Heterogenous, not localized throughout SC or primarily SG/SC interface | Heterogenous, Present at parakeratotic cells                        | Mild casein activity in the stratum corneum                   |
| <b>7</b>       | Heterogenous, either primarily at SG/SC interface, or intracellular, throughout the epidermis | Heterogenous, either throughout SC, or almost absent               | Heterogenous, absent or primarily SG/SC interface                      | Heterogenous, absent or present at parakeratotic cells              | Moderate casein activity in the stratum corneum, Heterogenous |
| <b>8</b>       | Intracellular, throughout the epidermis                                                       | Absent                                                             | Heterogenous, absent or primarily SG/SC interface                      | Absent                                                              | Strong casein activity in the stratum corneum                 |
| <b>9</b>       | Heterogenous, either in parakeratotic cells, or intracellular, throughout the epidermis       | Not localized, throughout SC                                       | Primarily in parakeratotic cells                                       | Heterogenous, in outer SC layers or present at parakeratotic cells  | Strong casein activity in the stratum corneum                 |
| <b>10</b>      | Primarily SG/SC interface, but also intracellular, throughout the epidermis                   | Absent                                                             | Heterogenous, not localized or outer SC layers                         | Heterogenous: Primarily absent, more present at parakeratotic cells | ND                                                            |
| <b>Control</b> | Primarily SG/SC interface                                                                     | Primarily localized at SG/SC interface and lower SC layers         | Primarily SG/SC interface                                              | Primarily at the SG/SC interface and lower SC layers                | Absent                                                        |

ND means not determined



## Supplemental References

- Motta S, Monti M, Sesana S, Caputo R, Carelli S, Ghidoni R. Ceramide composition of the psoriatic scale. *Biochim Biophys Acta* 1993;1182(2):147-51.
- van Diggelen OP, Voznyi YV, Keulemans JL, Schoonderwoerd K, Ledvinova J, Mengel E, et al. A new fluorimetric enzyme assay for the diagnosis of Niemann-Pick A/B, with specificity of natural sphingomyelinase substrate. *J Inher Metab Dis* 2005;28(5):733-41.
- van Smeden J, Hoppel L, van der Heijden R, Hankemeier T, Vreeken RJ, Bouwstra JA. LC/MS analysis of stratum corneum lipids: ceramide profiling and discovery. *J Lipid Res* 2011;52(6):1211-21.
